# Supplementary material for: Prevalences of hyperuricemia and electrolyte abnormalities in patients with chronic kidney disease in Japan: A nationwide, cross-sectional cohort study using data from the Japan Chronic Kidney Disease Database (J-CKD-DB)
Source: PubMed Central journal article supplement (PMC7561156; doi:10.1371/journal.pone.0240402), 2020-10-15
Supplement: pone.0240402.s001.pdf [file pone.0240402.s001.pdf]

**S1 Table: Participant Stratification According to eGFR Category, Age, and Sex Strata.**

|                                        | eGFR category |         |         |        |
|----------------------------------------|---------------|---------|---------|--------|
|                                        | G3a           | G3b     | G4      | G5     |
| eGFR range, mL/min/1.73 m <sup>2</sup> | 45–59         | 30–44   | 15–29   | <15    |
| <i>n</i>                               | 23,333        | 8,357   | 2,710   | 1,108  |
| Prevalence                             | 65.7%         | 23.5%   | 7.6%    | 3.1%   |
| Age strata                             |               |         |         |        |
| 18–44 years                            | 718           | 223     | 131     | 101    |
|                                        | (61.2%)       | (19.0%) | (11.2%) | (8.6%) |
| 45–64 years                            | 5,815         | 1,330   | 489     | 332    |
|                                        | (73.0%)       | (16.7%) | (6.1%)  | (4.2%) |
| 65–74 years                            | 8,146         | 2,472   | 688     | 322    |
|                                        | (70.1%)       | (21.3%) | (5.9%)  | (2.8%) |
| 75–84 years                            | 6,994         | 3,131   | 908     | 276    |
|                                        | (61.8%)       | (27.7%) | (8.0%)  | (2.4%) |
| 85+ years                              | 1,660         | 1,201   | 494     | 77     |
|                                        | (48.4%)       | (35.0%) | (14.4%) | (2.2%) |
| Sex strata                             |               |         |         |        |
| Men                                    | 12,661        | 4,614   | 1,434   | 651    |
|                                        | (65.4%)       | (23.8%) | (7.4%)  | (3.4%) |
| Women                                  | 10,672        | 3,743   | 1,276   | 457    |
|                                        | (66.1%)       | (23.2%) | (7.9%)  | (2.8%) |

Abbreviation: eGFR, estimated glomerular filtration rate;
