# Supplementary material for: Prevalences of hyperuricemia and electrolyte abnormalities in patients with chronic kidney disease in Japan: A nationwide, cross-sectional cohort study using data from the Japan Chronic Kidney Disease Database (J-CKD-DB)
Source: PubMed Central journal article supplement (PMC7561156; doi:10.1371/journal.pone.0240402), 2020-10-15
Supplement: pone.0240402.s002.pdf [file pone.0240402.s002.pdf]

**S2 Table: Serum Uric Acid Status According to G Category, Age, and Sex Strata.**

| Total |      | 18-44 Y           | 45-64 Y           | 65-74 Y            | 75-84 Y            | 85+ Y              | men               | women              | subtotal          |
|-------|------|-------------------|-------------------|--------------------|--------------------|--------------------|-------------------|--------------------|-------------------|
| G3a   | mean | 6.21 <sup>†</sup> | 5.96              | 5.83 <sup>†</sup>  | 5.66 <sup>†</sup>  | 5.48 <sup>†</sup>  | 6.18              | 5.31 <sup>‡</sup>  | 5.80              |
|       | SD   | 1.63              | 1.39              | 1.29               | 1.25               | 1.32               | 1.28              | 1.22               | 1.33              |
| G3b   | mean | 6.59 <sup>*</sup> | 6.59 <sup>*</sup> | 6.44 <sup>*†</sup> | 6.26 <sup>*†</sup> | 6.14 <sup>*†</sup> | 6.55 <sup>*</sup> | 6.11 <sup>*‡</sup> | 6.36 <sup>*</sup> |
|       | SD   | 1.72              | 1.57              | 1.42               | 1.41               | 1.46               | 1.44              | 1.46               | 1.47              |
| G4    | mean | 7.03 <sup>*</sup> | 7.05 <sup>*</sup> | 6.93 <sup>*</sup>  | 6.80 <sup>*†</sup> | 7.08 <sup>*</sup>  | 7.05 <sup>*</sup> | 6.82 <sup>*‡</sup> | 6.94 <sup>*</sup> |
|       | SD   | 1.86              | 1.73              | 1.69               | 1.75               | 1.96               | 1.80              | 1.76               | 1.78              |
| G5    | mean | 6.43              | 6.03              | 6.13 <sup>*</sup>  | 6.28 <sup>*</sup>  | 6.68 <sup>*†</sup> | 6.22              | 6.16 <sup>*</sup>  | 6.20 <sup>*</sup> |
|       | SD   | 2.99              | 2.01              | 2.27               | 2.12               | 2.03               | 2.29              | 2.14               | 2.23              |

serum uric acid level (mg/dl) were expressed as mean and standard deviation (SD) and analyzed by one-way ANOVA.

\*:p<0.05 vs. G3a, †: p<0.05 vs. 45-64Y, ‡:p<0.05 vs. men.
