# Supplementary material for: Prevalences of hyperuricemia and electrolyte abnormalities in patients with chronic kidney disease in Japan: A nationwide, cross-sectional cohort study using data from the Japan Chronic Kidney Disease Database (J-CKD-DB)
Source: PubMed Central journal article supplement (PMC7561156; doi:10.1371/journal.pone.0240402), 2020-10-15
Supplement: pone.0240402.s003.pdf [file pone.0240402.s003.pdf]

**S3 Table: Prevalence of Hyperuricemia According to G Category, Age, and Sex Strata.**

|     |   | 18-44 Y           | 45-64 Y           | 65-74 Y            | 75-84 Y            | 85+ Y              | men               | women              | subtotal          |
|-----|---|-------------------|-------------------|--------------------|--------------------|--------------------|-------------------|--------------------|-------------------|
| G3a | % | 27.1 <sup>†</sup> | 21.7              | 17.8 <sup>†</sup>  | 13.6 <sup>†</sup>  | 12.8 <sup>†</sup>  | 24.7              | 8.3 <sup>‡</sup>   | 17.6              |
| G3b | % | 33.7              | 35.3 <sup>*</sup> | 31.4 <sup>†*</sup> | 28.6 <sup>†*</sup> | 25.6 <sup>†*</sup> | 34.5 <sup>*</sup> | 24.8 <sup>‡*</sup> | 30.3 <sup>*</sup> |
| G4  | % | 49.2 <sup>*</sup> | 49.7 <sup>*</sup> | 46.3 <sup>*</sup>  | 41.3 <sup>†*</sup> | 45.6 <sup>*</sup>  | 47.2 <sup>*</sup> | 43.4 <sup>*</sup>  | 45.4 <sup>*</sup> |
| G5  | % | 31.5              | 30.2 <sup>*</sup> | 29.4 <sup>*</sup>  | 33.0 <sup>*</sup>  | 42.1 <sup>*</sup>  | 32.7 <sup>*</sup> | 29.9 <sup>*</sup>  | 31.5 <sup>*</sup> |

The prevalence rate of hyperuricemia was expressed as % of each population and analyzed by chi-square test.

\*:p<0.05 vs. G3a, †: p<0.05 vs. 45-64Y, ‡:p<0.05 vs. men

Abbreviation: UA, serum uric acid level
