# Supplementary material for: Prevalences of hyperuricemia and electrolyte abnormalities in patients with chronic kidney disease in Japan: A nationwide, cross-sectional cohort study using data from the Japan Chronic Kidney Disease Database (J-CKD-DB)
Source: PubMed Central journal article supplement (PMC7561156; doi:10.1371/journal.pone.0240402), 2020-10-15
Supplement: pone.0240402.s004.pdf [file pone.0240402.s004.pdf]

**S4 Table: Prevalences of Electrolyte Abnormalities According to G Category Strata.**

|     |   | Na ≤ 135mEq/L   | Na ≥ 145 mEq/L   | K ≤ 3.5 mEq/L | K ≥ 5.5 mEq/L | Na-Cl ≤ 30 mEq/L |
|-----|---|-----------------|------------------|---------------|---------------|------------------|
| G3a | % | 2.1%            | 4.5%             | 2.1%          | 0.7%          | 0.2%             |
| G3b | % | 3.7%*           | 4.3%             | 2.3%          | 2.7%*         | 1.0%*            |
| G4  | % | 5.6%*           | 5.5%*            | 2.2%          | 8.3%*         | 4.6%*            |
| G5  | % | 9.1%*           | 4.5%             | 4.2%*         | 11.6%*        | 7.5%*            |
|     |   | cCa ≤ 8.4 mg/dl | cCa ≥ 10.3 mg/dl | P ≤ 2.5 mg/dl | P ≥ 4.5 mg/dl |                  |
| G3a | % | 1.4%            | 1.4%             | 5.7%          | 3.4%          |                  |
| G3b | % | 1.9%            | 3.5%*            | 7.2%*         | 4.8%*         |                  |
| G4  | % | 3.1%*           | 5.8%*            | 3.4%*         | 10.4%*        |                  |
| G5  | % | 10.7%*          | 7.4%*            | 3.1%*         | 40.8%*        |                  |

The prevalence rate was expressed as % of each population.

Abbreviation: Na, serum sodium; K, serum potassium, Cl, serum chloride; Na-Cl, the difference between serum sodium and chloride concentrations; cCa, serum corrected calcium, P, serum phosphate

\*:p<0.05 vs. G3a.
