# Supplementary material for: Prevalences of hyperuricemia and electrolyte abnormalities in patients with chronic kidney disease in Japan: A nationwide, cross-sectional cohort study using data from the Japan Chronic Kidney Disease Database (J-CKD-DB)
Source: PubMed Central journal article supplement (PMC7561156; doi:10.1371/journal.pone.0240402), 2020-10-15
Supplement: pone.0240402.s005.pdf [file pone.0240402.s005.pdf]

**S5 Table: Adjusted Odds Ratios and 95% Confidence Intervals for Hyperkalemia ( $K \geq 5.5$  mEq/L).**

|                      |     | hyperkalemia ( $K \geq 5.5$ mEq/L) |
|----------------------|-----|------------------------------------|
| Narrower serum Na-Cl |     | 3.18 [2.13-4.74]                   |
| G grade              | G3a | 1                                  |
|                      | G3b | 3.57 [2.66-4.80]                   |
|                      | G4  | 10.7 [7.81-14.6]                   |
|                      | G5  | 11.8 [8.23-17.0]                   |

**Covariate: age, sex, G grade, A grade, Alb, Hb, Narrower serum Na-Cl**

The adjusted odds ratio and 95% confidence intervals were analyzed by logistic regression analysis with each of the above factors as covariates.

Abbreviation: Na, serum sodium; K, serum potassium, Cl, serum chloride; Na-Cl, the difference between serum sodium and chloride concentrations;
